# Supplementary material
Source: ML conference proceedings conference paper supplement (https://openaccess.thecvf.com/content/CVPR_2020/html/Guizilini_3D_Packing_for_CVPR_2020_paper.html)
Supplement: Supplementary file 1 [file Guizilini_3D_Packing_for_CVPR_2020_supplemental.zip]

# 3D Packing for Self-Supervised Monocular Depth Estimation: Supplementary Material

Vitor Guizilini Rareş Ambruş Sudeep Pillai Allan Raventos Adrien Gaidon

Toyota Research Institute (TRI)

first.lastname@tri.global

## 1. Pose evaluation

In Table 1 we show the results of our proposed *PackNet-SfM* framework on the KITTI odometry benchmark [3]. To compare with related methods, we train our framework from scratch on sequences 00-08 of the KITTI odometry benchmark, with exactly the same parameters and networks used for depth evaluation (Table 3, main text). For consistency with related methods, we compute the Absolute Trajectory Error (ATE) averaged over all overlapping 5-frame snippets on sequences 09 and 10. Note that our pose network only takes two frames as input, and outputs a single transformation between that pair of frames. To evaluate our model on 5-frame snippets we combine the relative transformations between the target frame and the first context frame into 5-frame long overlapping trajectories, i.e. we stack  $f_x(I_t, I_{t-1}) = x_{t \rightarrow t-1}$  to create appropriately sized trajectories.

The ATE results are summarized in Table 1, with our proposed framework achieving competitive results relative to other related methods. We also note that all these related methods are trained in the monocular setting (M), and there-

fore scaled at test-time using ground truth information. Our method, on the other hand, when trained with the proposed velocity supervision loss (M+v) does not require ground-truth scaling at test-time, as it is able to recover metrically accurate scale purely from monocular imagery. Nevertheless, it is still able to achieve competitive results compared to other methods. Examples of reconstructed trajectories obtained using *PackNet-SfM* for the test sequences can be found in Figure 1.

## 2. Dense Depth for Automated Driving (DDAD)

In this section, we provide a brief overview of our newly introduced *DDAD (Dense Depth for Automated Driving)* dataset and the relevant properties that make it desirable as a dense depth estimation benchmark. It includes a high-resolution, long-range Luminar-H2<sup>1</sup> as the LiDAR sensor used to generate pointclouds, with a maximum range of 250m and sub-1cm range precision. Additionally, it con-

<sup>1</sup><https://www.luminartech.com/technology>

| Method                            | Supervision | Resolution | GT | Seq. 09              | Seq. 10              |
|-----------------------------------|-------------|------------|----|----------------------|----------------------|
| SfMLearner (Zhou et al. [7])      | M           | 416 x 128  | ✓  | 0.021 ± 0.017        | 0.020 ± 0.015        |
| Monodepth2 (Godard et al. [4])    | M           | 640 x 192  | ✓  | 0.017 ± 0.008        | 0.015 ± 0.010        |
| DF-Net (Zou et al. [8])           | M           | 576 x 160  | ✓  | 0.017 ± 0.007        | 0.015 ± 0.009        |
| Vid2Depth (Mahjourian et al. [5]) | M           | 416 x 128  | ✓  | 0.013 ± 0.010        | 0.012 ± 0.011        |
| GeoNet (Yin et al. [6])           | M           | 416 x 128  | ✓  | 0.012 ± 0.007        | 0.012 ± 0.009        |
| Struct2Depth (Casser et al. [2])  | M           | 416 x 128  | ✓  | 0.011 ± 0.006        | 0.011 ± 0.010        |
| TwoStreamNet (Ambruş et al. [1])  | M           | 640 x 192  | ✓  | <b>0.010 ± 0.002</b> | <b>0.009 ± 0.002</b> |
| <b>PackNet-SfM</b>                | M           | 640 x 192  | ✓  | 0.011 ± 0.006        | <b>0.009 ± 0.007</b> |
| <b>PackNet-SfM</b>                | M+v         | 640 x 192  | ✓  | <b>0.010 ± 0.005</b> | <b>0.009 ± 0.008</b> |
| <b>PackNet-SfM</b>                | M+v         | 640 x 192  |    | 0.014 ± 0.007        | 0.012 ± 0.008        |

Table 1: **Average Absolute Trajectory Error (ATE) in meters on the KITTI Odometry Benchmark [3]:** All methods are trained on Sequences 00-08 and evaluated on Sequences 09-10. The ATE numbers are averaged over all overlapping 5-frame snippets in the test sequences. M+v refers to velocity supervision (v) in addition to monocular images (M). The *GT* checkmark indicates the use of ground-truth translation to scale the estimates at test-time.

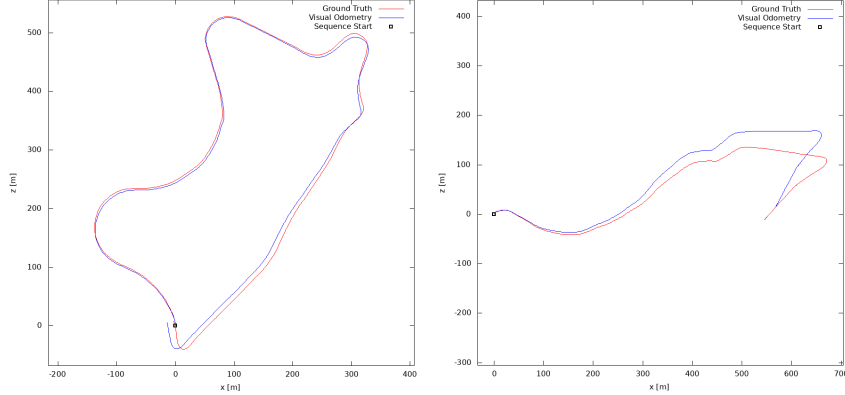

Figure 1: **Pose evaluation on KITTI test sequences.** Qualitative trajectory results of *PackNet-SfM* on test sequences 09 and 10 of the KITTI odometry benchmark.

tains six calibrated cameras time-synchronized at 10 Hz, that together produce a  $360^\circ$  coverage around the vehicle. Note that in our work we only use information from the front-facing camera for training and evaluation.

Examples of a Luminar-H2 pointcloud projected onto each of these six cameras are shown in Figures 2, 3 and 4, for different urban settings. The depth maps generated from projecting these Luminar pointclouds onto the camera frame allow us to evaluate depth estimation methods in a much more challenging way, both in terms of denseness and longer ranges. In Table 2 and Figure 6 of the main text we show how our proposed *PackNet* architecture outperforms other related methods under these conditions. In fact, the gap in performance increases when considering denser ground-truth information at longer ranges, both on the entire interval and at discretized bins.

DDAD is a cross-continental dataset with scenes drawn from urban settings in the United States (San Francisco Bay Area, Detroit and Ann Arbor) and Japan (Tokyo and Odaiba). Each scene is 5 or 10 seconds long and consists of 50 or 100 samples with corresponding Luminar-H2 pointcloud and six image frames, including intrinsic and extrinsic calibration. The training set contains 194 scenes with a total of 17050 individual samples, and the validation set contains 60 scenes with a total of 4150 samples. The six cameras are 2.4 MP ( $1936 \times 1216$ ), global-shutter, and oriented at  $60^\circ$  intervals. They are synchronized with 10 Hz scans from our Luminar-H2 sensors oriented at  $90^\circ$  intervals.

## References

- [1] Rares Ambrus, Vitor Guizilini, Jie Li, Sudeep Pillai, and Adrien Gaidon. Two stream networks for self-supervised ego-

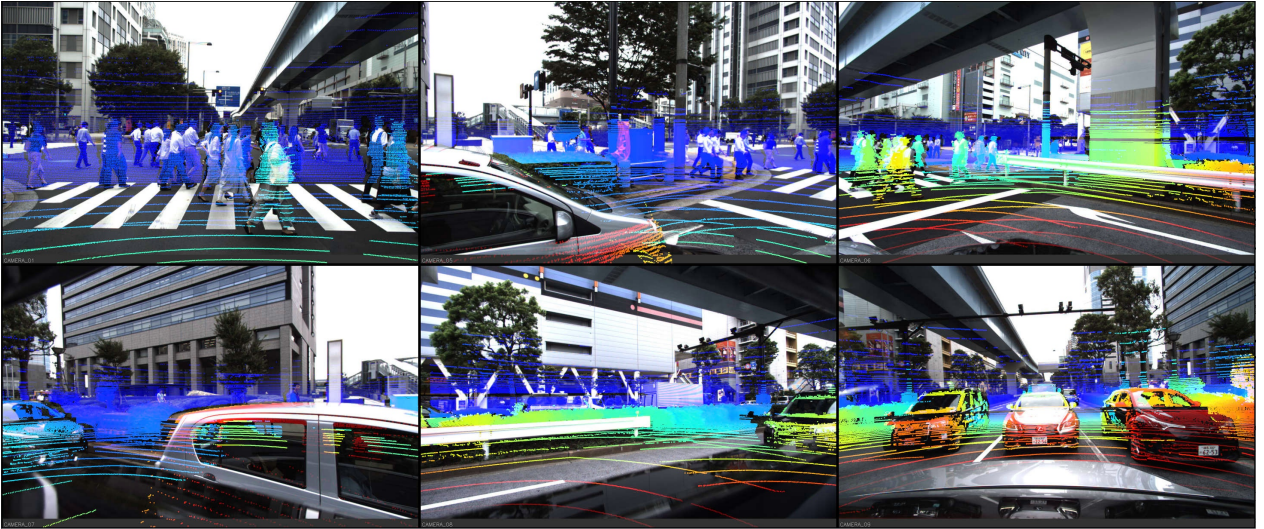

Figure 2: **DDAD sample** from Tokyo, Japan.



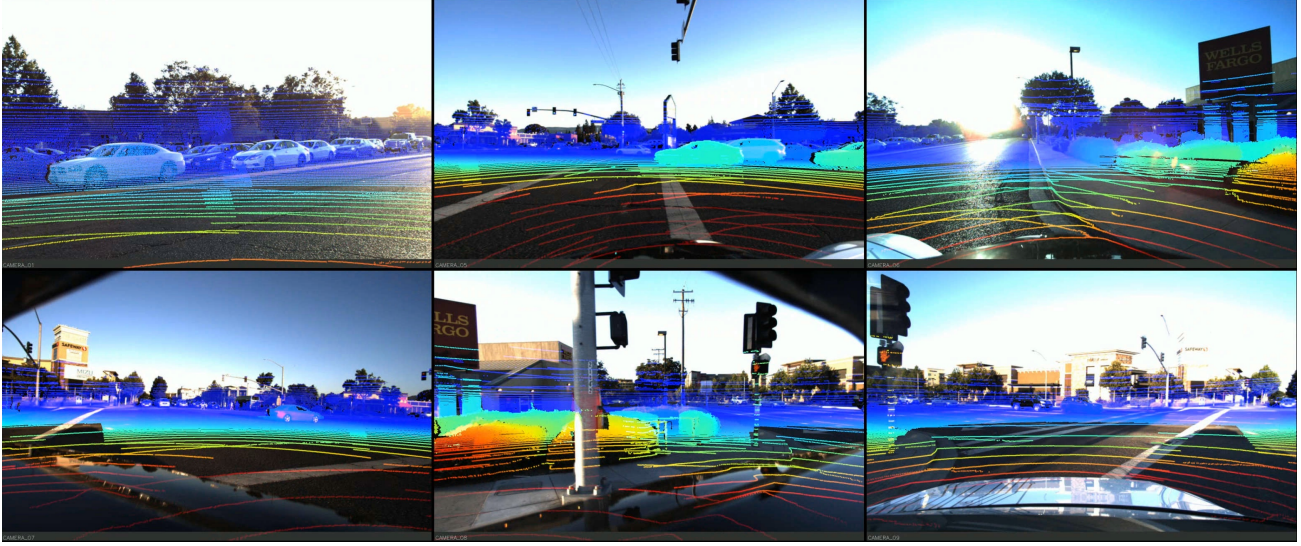

Figure 3: **DDAD sample** from San Francisco Bay Area, California.

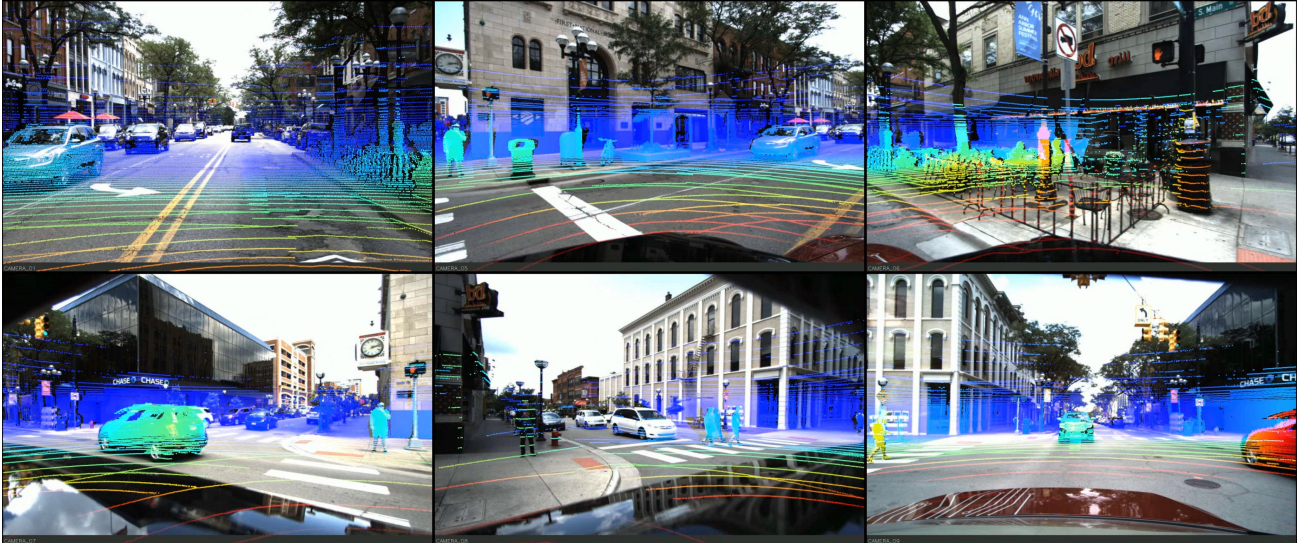

Figure 4: **DDAD sample** from Detroit, Michigan.

motion estimation. In *Proceedings of the Conference on Robot Learning (CoRL)*, 2019. 1

- [2] Vincent Casser, Soeren Pirk, Reza Mahjourian, and Anelia Angelova. Depth prediction without the sensors: Leveraging structure for unsupervised learning from monocular videos. In *AAAI*, 2019. 1
- [3] Andreas Geiger, Philip Lenz, Christoph Stiller, and Raquel Urtasun. Vision meets robotics: The kitti dataset. *The International Journal of Robotics Research*, 32(11):1231–1237, 2013. 1
- [4] Clément Godard, Oisín Mac Aodha, Michael Firman, and Gabriel J. Brostow. Digging into self-supervised monocular depth prediction. In *ICCV*, 2019. 1
- [5] Reza Mahjourian, Martin Wicke, and Anelia Angelova. Un-

supervised learning of depth and ego-motion from monocular video using 3d geometric constraints. In *Proceedings of the IEEE Conference on Computer Vision and Pattern Recognition*, pages 5667–5675, 2018. 1

- [6] Zhichao Yin and Jianping Shi. Geonet: Unsupervised learning of dense depth, optical flow and camera pose. In *Proceedings of the IEEE Conference on Computer Vision and Pattern Recognition (CVPR)*, volume 2, 2018. 1
- [7] Tinghui Zhou, Matthew Brown, Noah Snavely, and David G Lowe. Unsupervised learning of depth and ego-motion from video. In *CVPR*, volume 2, page 7, 2017. 1
- [8] Yuliang Zou, Zelun Luo, and Jia-Bin Huang. Df-net: Unsupervised joint learning of depth and flow using cross-task consistency. In *ECCV*, 2018. 1
